# Supplementary material for: Effects of Human Disturbance on Riparian Wetland Landscape Pattern in a Coastal Region
Source: MDPI journal article supplement (doi:10.3390/rs14205160), 2022-10-15
Supplement: s1 [file s1]

Archive with 1 entries (1 files):
- remotesensing-1926055-supplementary.pdf
