# Supplementary material for: Effects of Human Disturbance on Riparian Wetland Landscape Pattern in a Coastal Region
Source: MDPI journal article supplement (doi:10.3390/rs14205160), 2022-10-15
Supplement: s1 [file s1 › remotesensing-1926055-supplementary.pdf]

**Table S1.** Remote sensing interpretation marks for land use/land cover in the study area.

| Category I  | Category II       | Description                                                                                                                    | Remote sensing image example                                                          |
|-------------|-------------------|--------------------------------------------------------------------------------------------------------------------------------|---------------------------------------------------------------------------------------|
| Wetland     | Ditch             | The general designation of waterways dug for irrigation or drainage.                                                           | 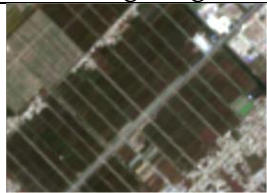   |
|             | River             | Natural linear waterbody with flowing water in inland areas.                                                                   | 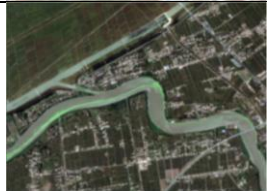   |
|             | Pond              | A small area of still water, especially one that is artificial.                                                                | 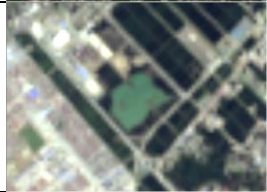   |
|             | Beach             | The intertidal flat with no or very low vegetation coverage including sand beach, rocky shore, and coral reef.                 | 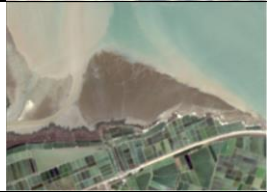  |
|             | Paddy field       | An irrigated or flooded field where rice is grown.                                                                             | 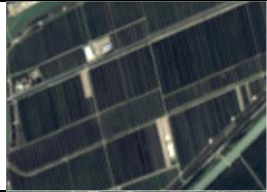 |
|             | Brine pan         | Artificial flat depression ground covered with salt and other minerals close to the sea.                                       | 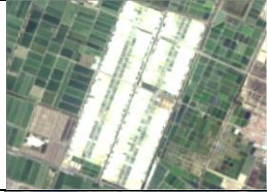 |
| Non-wetland | Dryland           | Generally refers to the farmland with no irrigation facilities, and mainly relies on natural precipitation to plant dry crops. | 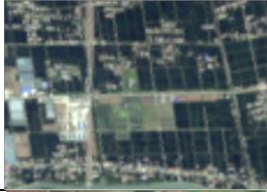 |
|             | Other arable land | Other cultivated types except for paddy fields and dryland.                                                                    | 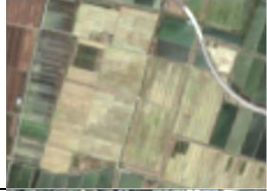 |
|             | Construction land | Refers to the land where the buildings and structures are constructed.                                                         | 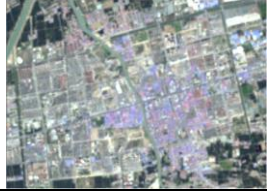 |

|               |                    |                                                                                                                                                    |                                                                                       |
|---------------|--------------------|----------------------------------------------------------------------------------------------------------------------------------------------------|---------------------------------------------------------------------------------------|
| Land boundary | Garden             | It refers to the garden where fruit trees are planted.                                                                                             | 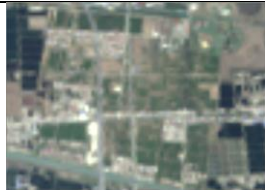   |
|               | Grassland          | A large area of open land is covered with wild grass.                                                                                              | 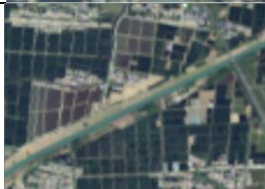   |
|               | Other unused lands | Refers to land other than agricultural land and construction land, mainly including saline-alkali land, swamp land, sandy land, barren earth, etc. | 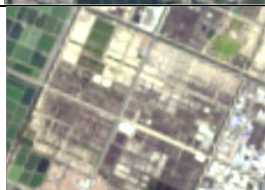   |
|               | Traffic land       | It refers to various roads and ancillary facilities outside the residential area and land for the civil airport.                                   | 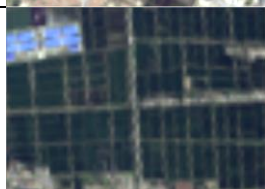   |
|               | Woodland           | An area of land that is covered with trees.                                                                                                        | 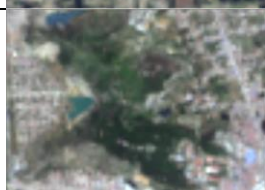  |
|               | City               | A large and important town.                                                                                                                        | 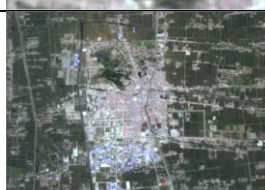 |
|               | Village            | A very small town located in a country area.                                                                                                       | 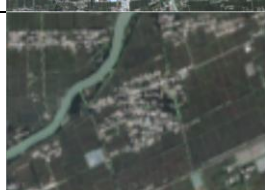 |
|               | Port               | A place where ships load and unload goods or shelter from storms.                                                                                  | 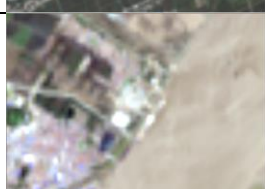 |
|               | Industrial land    | Refers to the land used for independent factories, workshops, handicraft workshops, etc.                                                           | 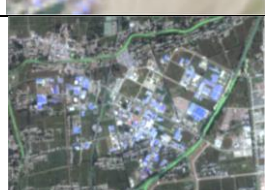 |
|               | Coastline          | The coastline is the boundary between ocean and land.                                                                                              | 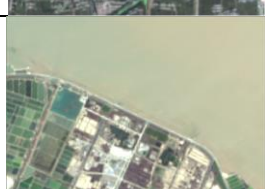 |
